# Supplementary material
Source: PubMed Central journal article supplement (PMC5215827)
Supplement: NIHMS831879-supplement-1.pdf [file NIHMS831879-supplement-1.pdf]

**Table S1. qPCR probe set.**

| Gene             | Name                                                        | Entrez                 | ABI assay     |
|------------------|-------------------------------------------------------------|------------------------|---------------|
| <i>Gal</i>       | galanin                                                     | <a href="#">14419</a>  | Mm00439056_m1 |
| <i>Serpina3n</i> | serine (or cysteine) peptidase inhibitor, clade A, member 3 | <a href="#">20716</a>  | Mm00776439_m1 |
| <i>Npw</i>       | neuropeptide W                                              | <a href="#">381073</a> | Mm01299908_g1 |
| <i>Drd4</i>      | dopamine receptor D4                                        | <a href="#">13491</a>  | Mm00432893_m1 |
| <i>Mt2</i>       | metallothionein 2                                           | <a href="#">17750</a>  | Mm00809556_s1 |
| <i>Vim</i>       | vimentin                                                    | <a href="#">22352</a>  | Mm01333430_m1 |
| <i>Gfap</i>      | glial fibrillary acidic protein                             | <a href="#">14580</a>  | Mm01253033_m1 |
| <i>Cdkn1a</i>    | cyclin-dependent kinase inhibitor 1A (P21)                  | <a href="#">12575</a>  | Mm00432448_m1 |
| <i>Ptx3</i>      | pentraxin related gene                                      | <a href="#">19288</a>  | Mm00477268_m1 |
| <i>Hif3a</i>     | hypoxia inducible factor 3, alpha subunit                   | <a href="#">53417</a>  | Mm00469375_m1 |
| <i>Gldn</i>      | gliomedin                                                   | <a href="#">235379</a> | Mm00616548_m1 |
