# Supplementary material
Source: PubMed Central journal article supplement (PMC5215827)
Supplement: NIHMS831879-supplement-2.pdf [file NIHMS831879-supplement-2.pdf]

**Table S2.** Transcript abundance changes at ion channel genes in forebrains of post-seizures Scn8a D/+ mice.

| Gene                                    | Channel | log2FoldCha | fold change | lfcSE | stat   | pvalue | padj  |
|-----------------------------------------|---------|-------------|-------------|-------|--------|--------|-------|
| <i>Voltage-gated sodium channels</i>    |         |             |             |       |        |        |       |
| Scn1a                                   | Nav1.1  | 0.025       | 1.0         | 0.191 | 0.130  | 0.897  | 1.0   |
| Scn1b                                   | Navβ1   | -0.168      | -0.90       | 0.229 | -0.731 | 0.465  | 0.745 |
| Scn2a                                   | Nav1.2  | 0.083       | 1.1         | 0.291 | 0.287  | 0.774  | 0.9   |
| Scn2b                                   | Navβ2   | -0.574      | -0.7        | 0.282 | -2.035 | 0.042  | 0.215 |
| Scn3a                                   | Nav1.3  | 0.277       | 1.2         | 0.245 | 1.130  | 0.258  | 0.6   |
| Scn3b                                   | Navβ3   | -0.004      | -1.0        | 0.137 | -0.029 | 0.977  | 0.992 |
| Scn4a                                   | Nav1.4  | 0.334       | 1.3         | 0.278 | 1.199  | 0.230  | NA    |
| Scn4b                                   | Navβ4   | -0.511      | -0.7        | 0.216 | -2.366 | 0.018  | 0.132 |
| Scn5a                                   | Nav1.5  | 0.518       | 1.4         | 0.307 | 1.686  | 0.092  | 0.3   |
| Scn8a                                   | Nav1.6  | 0.041       | 1.0         | 0.295 | 0.140  | 0.888  | 1.0   |
| Scn9a                                   | Nav1.7  | -0.161      | -1.1        | 0.307 | -0.523 | 0.601  | 0.8   |
| Scn10a                                  | Nav1.8  | 0.774       | 1.7         | 0.359 | 2.155  | 0.031  | 0.2   |
| Scn11a                                  | Nav1.9  | 1.109       | 2.2         | 0.358 | 3.102  | 0.002  | 0.0   |
| <i>Voltage-gated calcium channels</i>   |         |             |             |       |        |        |       |
| Cacna1s                                 | Cav1.1  | -0.237      | -1.2        | 0.359 | -0.661 | 0.509  | 0.8   |
| Cacna1c                                 | Cav1.2  | 0.314       | 1.2         | 0.270 | 1.163  | 0.245  | 0.6   |
| Cacna1d                                 | Cav1.3  | 0.217       | 1.2         | 0.170 | 1.277  | 0.202  | 0.5   |
| Cacna1f                                 | Cav1.4  | -0.138      | -1.1        | 0.351 | -0.392 | 0.695  | 0.9   |
| Cacna1a                                 | Cav2.1  | 0.226       | 1.2         | 0.240 | 0.943  | 0.345  | 0.7   |
| Cacna1b                                 | Cav2.2  | 0.204       | 1.2         | 0.240 | 0.850  | 0.395  | 0.7   |
| Cacna1e                                 | Cav2.3  | 0.168       | 1.1         | 0.310 | 0.543  | 0.587  | 0.8   |
| Cacna1g                                 | Cav3.1  | 0.562       | 1.5         | 0.253 | 2.226  | 0.026  | 0.2   |
| Cacna1h                                 | Cav3.2  | 0.203       | 1.2         | 0.178 | 1.139  | 0.255  | 0.6   |
| Cacna1i                                 | Cav3.3  | -0.165      | -1.1        | 0.290 | -0.571 | 0.568  | 0.8   |
| <i>Voltage-gated potassium channels</i> |         |             |             |       |        |        |       |
| Kcna1                                   | Kv1.1   | 0.565       | 1.5         | 0.225 | 2.519  | 0.012  | 0.1   |
| Kcna2                                   | Kv1.2   | 0.119       | 1.1         | 0.298 | 0.399  | 0.690  | 0.9   |
| Kcna3                                   | Kv1.3   | 0.161       | 1.1         | 0.328 | 0.492  | 0.623  | 0.8   |
| Kcna4                                   | Kv1.4   | -0.295      | -1.2        | 0.294 | -1.004 | 0.316  | 0.6   |
| Kcna5                                   | Kv1.5   | 0.410       | 1.3         | 0.272 | 1.509  | 0.131  | 0.4   |
| Kcna6                                   | Kv1.6   | -0.492      | -1.4        | 0.270 | -1.823 | 0.068  | 0.3   |
| Kcna7                                   | Kv1.7   | 0.102       | 1.1         | 0.221 | 0.464  | 0.643  | NA    |
| Kcna10                                  | Kv1.8   | -0.015      | -1.0        | 0.118 | -0.130 | 0.896  | NA    |
| Kcnb1                                   | Kv2.1   | 0.299       | 1.2         | 0.242 | 1.235  | 0.217  | 0.5   |
| Kcnb2                                   | Kv2.2   | -0.260      | -1.2        | 0.313 | -0.830 | 0.406  | 0.7   |
| Kcnc1                                   | Kv3.1   | -0.105      | -1.1        | 0.244 | -0.433 | 0.665  | 0.9   |
| Kcnc2                                   | Kv3.2   | 0.029       | 1.0         | 0.260 | 0.112  | 0.911  | 1.0   |
| Kcnc3                                   | Kv3.3   | 0.095       | 1.1         | 0.194 | 0.491  | 0.623  | 0.8   |
| Kcnc4                                   | Kv3.4   | -0.137      | -1.1        | 0.141 | -0.972 | 0.331  | 0.6   |
| Kcnd1                                   | Kv4.1   | 0.293       | 1.2         | 0.283 | 1.036  | 0.300  | 0.6   |
| Kcnd2                                   | Kv4.2   | -0.007      | -1.0        | 0.242 | -0.027 | 0.978  | 1.0   |
| Kcnd3                                   | Kv4.3   | 0.340       | 1.3         | 0.222 | 1.535  | 0.125  | 0.4   |
| Kcnf1                                   | Kv5.1   | -0.199      | -1.0        | 0.192 | -1.037 | 0.300  | 0.6   |
| Kcng1                                   | Kv6.1   | -1.291      | -2.4        | 0.251 | -5.151 | 0.000  | 0.0   |
| Kcng2                                   | Kv6.2   | -0.262      | -1.2        | 0.333 | -0.787 | 0.431  | 0.7   |
| Kcng3                                   | Kv6.3   | 0.570       | 1.5         | 0.353 | 1.614  | 0.107  | 0.4   |
| Kcng4                                   | Kv6.4   | -0.549      | -1.5        | 0.273 | -2.007 | 0.045  | 0.2   |
| Kcnq1                                   | Kv7.1   | 0.496       | 1.4         | 0.356 | 1.393  | 0.164  | 0.5   |
| Kcnq2                                   | Kv7.2   | 0.336       | 1.3         | 0.232 | 1.449  | 0.147  | 0.4   |
| Kcnq3                                   | Kv7.3   | -0.010      | -1.0        | 0.283 | -0.037 | 0.971  | 1.0   |
| Kcnq4                                   | Kv7.4   | -0.404      | -1.3        | 0.213 | -1.900 | 0.057  | 0.3   |
| Kcnq5                                   | Kv7.5   | 0.027       | 1.0         | 0.178 | 0.150  | 0.881  | 1.0   |
| Kcnv1                                   | Kv8.1   | -0.334      | -1.3        | 0.253 | -1.321 | 0.187  | 0.5   |
| Kcnv2                                   | Kv8.2   | 0.050       | 1.0         | 0.284 | 0.177  | 0.860  | NA    |
| Kcns1                                   | Kv9.1   | -0.387      | -1.3        | 0.248 | -1.562 | 0.118  | 0.4   |
| Kcns2                                   | Kv9.2   | 0.050       | 1.0         | 0.278 | 0.181  | 0.857  | 0.9   |
| Kcns3                                   | Kv9.3   | -0.204      | -1.2        | 0.231 | -0.880 | 0.379  | 0.7   |
| Kcnh1                                   | Kv10.1  | 0.362       | 1.3         | 0.248 | 1.464  | 0.143  | 0.4   |
| Kcnh5                                   | Kv10.2  | 0.107       | 1.1         | 0.336 | 0.319  | 0.750  | 0.9   |
| Kcnh2                                   | Kv11.1  | 0.343       | 1.3         | 0.186 | 1.844  | 0.065  | 0.3   |
| Kcnh6                                   | Kv11.2  | -0.404      | -1.3        | 0.286 | -1.412 | 0.158  | 0.4   |
| Kcnh7                                   | Kv11.3  | -0.328      | -1.3        | 0.295 | -1.112 | 0.266  | 0.6   |
| Kcnh8                                   | Kv12.1  | 0.206       | 1.2         | 0.318 | 0.648  | 0.517  | NA    |
| Kcnh3                                   | Kv12.2  | -0.457      | -1.4        | 0.128 | -3.581 | 0.000  | 0.0   |
| Kcnh4                                   | Kv12.3  | -1.536      | -2.9        | 0.248 | -6.181 | 0.000  | 0.0   |
